# Supplementary material
Source: MDPI journal article supplement (https://www.mdpi.com/1999-4907/14/8/1597)
Supplement: s1 [file s1]

**Supplementary Table S1.** The primers sequences used in this study.

| Primer     | Sequence                                                     |
|------------|--------------------------------------------------------------|
| A04491-1F  | TAATATGCCGAGCTTACGGA                                         |
| A04491-2R  | TTGACCTCCACTAGCTCCAGCCAAGCCTTTGACCCTGAAGCAGGAAT              |
| A04491-3F  | CAAAGGAATAGAGTAGATGCCGACCGAAGGTTTTCTGGGTTCACA                |
| A04491-4R  | CTTGCCATCATCAGAATCCA                                         |
| A04491-5F  | CTGGGTCAAGCAAGCAATCA                                         |
| H855R      | GCTGATCTGACCAGTTGC                                           |
| A04491-7F  | CTTCCAGTCTTCGCTCCCTG                                         |
| A04491-8R  | GGTCTCGGCGAAGATGTAGG                                         |
| A04491-9F  | ACTCACTATAGGGCGAATTGGGTACTCAAATTGGTTACATCTGGATATGGAT<br>GACC |
| A04491-10R | CACCACCCCGGTGAACAGCTCCTCGCCCTTGCTCACCAACTCGTCGTGACCG<br>TCCT |
| Hyg F      | GGCTTGGCTGGAGCTAGTGGAGGTCAA                                  |
| Hyg R      | CGGTCGGCATCTACTCTATTCTTTG                                    |
| LHSRFPF    | CTATAGGGCGAATTGGGTACTCAAATTGGTTCCTCCAATTCTACACACACTC<br>AG   |
| LHSRFPF    | GAAGTCCTTGATGACGTCTCGGAGGAGGCCAACTCATCGTGCACCTCCTC           |
| LHS1-QF    | GCCGAGAAGATCCGTAGCAA                                         |
| LHS1-QR    | GAGAAGTCGTCTGGTTGGT                                          |
| SIL1-QF    | GGCGGAATGTTACCCCAAGA                                         |
| SIL1-QR    | CTTGGGCAGTCTCGGTTTCAT                                        |
| SCJ1-QF    | GCACGTTCTTCAGACGCAAG                                         |
| SCJ1-QR    | AGTCCACAAACAGGTTGCCA                                         |
| KAR2-QF    | ATATCGTTCTCGTCGGTGGC                                         |
| KAR2-QR    | GCTTGGTCATGACACCTCCA                                         |
| ACTIN-QF   | CCCCATCTACGAGGGTTTCG                                         |
| ACTIN-QR   | CGTCAGGAAGCTCGTAGGAC                                         |

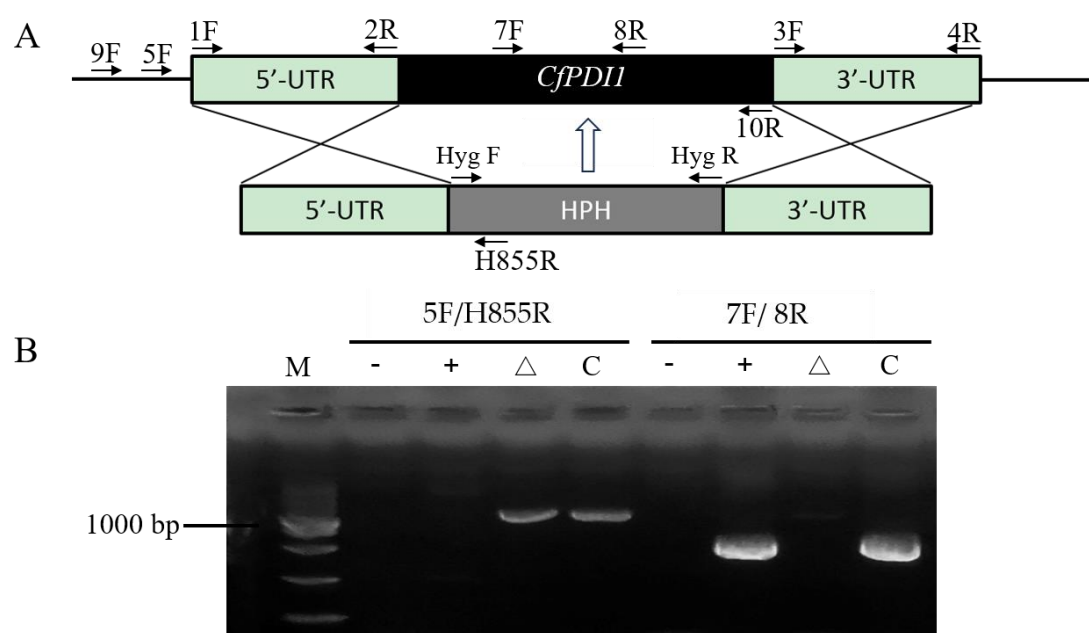

**Supplementary Figure S1.** Generation of the *CfPDI1* gene deletion mutant in *Colletotrichum fructicola*. A. Schematic diagram of the deletion gene strategy for the *CfPDI1*. B. M: DL2000 marker; -: H<sub>2</sub>O negative control; +: WT positive control; Δ: Mutant; C: Complemented strain.
